# Supplementary material
Source: Springer Nature journal article supplement (https://www.springermedizin.de/resource/supplementary/12906_2012_1205_MOESM2_ESM.pdf/9520126)
Supplement: MOESM2 [file 9520126]

Table 2 Cancer-related symptoms which physicians recognized the difficulty in treatment

| Symptoms                                | All (n=311) |      | Palliative care teams (n=226) |      | PCUs (n=79) |      | p-value | Specialists (n=128) |      | non-specialists (n=183) |      | p-value |
|-----------------------------------------|-------------|------|-------------------------------|------|-------------|------|---------|---------------------|------|-------------------------|------|---------|
|                                         | frequency   | %    | frequency                     | %    | frequency   | %    |         | frequency           | %    | frequency               | %    |         |
| Numbness/Hypesthesia                    | 240         | 77.2 | 180                           | 79.6 | 55          | 69.6 | 0.165   | 99                  | 77.3 | 141                     | 77.0 | 1.000   |
| Languor/Fatigue                         | 225         | 72.3 | 161                           | 71.2 | 61          | 77.2 | 0.276   | 99                  | 77.3 | 126                     | 68.9 | 0.122   |
| Delirium                                | 170         | 54.7 | 119                           | 52.7 | 48          | 60.8 | 0.447   | 73                  | 57.0 | 97                      | 53.0 | 0.490   |
| Taste alteration                        | 166         | 53.4 | 124                           | 54.9 | 42          | 53.2 | 0.029   | 77                  | 60.2 | 89                      | 48.6 | 0.050   |
| Edema (Local edema/Anasarca)            | 150         | 48.2 | 109                           | 48.2 | 39          | 49.4 | 0.821   | 59                  | 46.1 | 91                      | 49.7 | 0.565   |
| Pain                                    | 146         | 46.9 | 113                           | 50.0 | 31          | 39.2 | 0.226   | 55                  | 43.0 | 91                      | 49.7 | 0.250   |
| Anorexia/Weight Loss                    | 140         | 45.0 | 109                           | 48.2 | 30          | 38.0 | 0.108   | 64                  | 50.0 | 76                      | 41.5 | 0.165   |
| Abdominal Discomfort                    | 131         | 42.1 | 98                            | 43.4 | 31          | 39.2 | 0.735   | 55                  | 43.0 | 76                      | 41.5 | 0.816   |
| Stomatitis/Xerostomia                   | 122         | 39.2 | 89                            | 39.4 | 33          | 41.8 | 0.141   | 54                  | 42.2 | 68                      | 37.2 | 0.409   |
| Depression                              | 116         | 37.3 | 86                            | 38.1 | 30          | 38.0 | 0.175   | 41                  | 32.0 | 75                      | 41.0 | 0.122   |
| Adjustment Disorder                     | 113         | 36.3 | 73                            | 32.3 | 39          | 49.4 | 0.014   | 47                  | 36.7 | 66                      | 36.1 | 1.000   |
| Dyspnea/Breathlessness                  | 113         | 36.3 | 77                            | 34.1 | 35          | 44.3 | 0.162   | 48                  | 37.5 | 65                      | 35.5 | 0.811   |
| Nausea/Vomiting (others)                | 101         | 32.5 | 75                            | 33.2 | 24          | 30.4 | 0.893   | 38                  | 29.7 | 63                      | 34.4 | 0.392   |
| Dysphagia/Deglutition Disorder          | 100         | 32.2 | 68                            | 30.1 | 31          | 39.2 | 0.281   | 50                  | 39.1 | 50                      | 27.3 | 0.036   |
| Sleep disorder/Insomnia                 | 93          | 29.9 | 69                            | 30.5 | 23          | 29.1 | 0.796   | 42                  | 32.8 | 51                      | 27.9 | 0.379   |
| Constipation (caused by opioid use)     | 84          | 27.0 | 69                            | 30.5 | 15          | 19.0 | 0.038   | 34                  | 26.6 | 50                      | 27.3 | 0.898   |
| Nausea/Vomiting (during chemotherapy)   | 76          | 24.4 | 71                            | 31.4 | 5           | 6.3  | 0.000   | 27                  | 21.1 | 49                      | 26.8 | 0.284   |
| Muscle Weakness                         | 65          | 20.9 | 46                            | 20.4 | 19          | 24.1 | 0.346   | 34                  | 26.6 | 31                      | 16.9 | 0.047   |
| Nausea/Vomiting (caused by opioid use)  | 61          | 19.6 | 51                            | 22.6 | 10          | 12.7 | 0.690   | 24                  | 18.8 | 37                      | 20.2 | 0.774   |
| Constipation (not caused by opioid use) | 59          | 19.0 | 47                            | 20.8 | 11          | 13.9 | 0.377   | 28                  | 21.9 | 31                      | 16.9 | 0.305   |
| Muscle Cramp                            | 42          | 13.5 | 31                            | 13.7 | 11          | 13.9 | 0.741   | 23                  | 18.0 | 19                      | 10.4 | 0.064   |
| Diarrhea                                | 40          | 12.9 | 34                            | 15.0 | 6           | 7.6  | 0.136   | 16                  | 12.5 | 24                      | 13.1 | 1.000   |
| Anemia                                  | 29          | 9.3  | 24                            | 10.6 | 5           | 6.3  | 0.344   | 16                  | 12.5 | 13                      | 7.1  | 0.177   |
| Others                                  | 11          | 3.5  | 6                             | 2.7  | 5           | 6.3  | 0.325   | 4                   | 3.1  | 7                       | 3.8  | 0.770   |

\*Multiple answers allowed
